# Supplementary material
Source: PubMed Central journal article supplement (PMC10053064)
Supplement: NIHMS1876621-supplement-Supplemental_Material.pdf [file NIHMS1876621-supplement-Supplemental_Material.pdf]

## Supplementary Note 1.

AAV9-cTnT-ABEmax-VRQR-h403 N-terminal half

AAV ITR

Cardiac Troponin T promoter

Nuclear Localization Signals (Bipartite NLS)

ABEmax

Linkers

SpCas9-VRQR N-terminal half

Npu N-terminal fragment

WPRES-3 (Woodchuck Hepatitis Virus Posttranscriptional Regulatory Element-3)

bGH poly(A) signal (bovine growth hormone polyadenylation signal)

hU6 promoter-sgRNA scaffold

h403\_sgRNA

Highlighted Text (Nuclear localization signals, ABEmax, Linkers, SpCas9-VRQR, Npu N-terminal fragment) encode expressed proteins.

ctgcgcgctcgtcgtcactgagccgcccgggcaaagcccgggctcgggacgttggcgcggcctcagtgagcagcgag  
cgcgcagagagggagtgcccaactccatcactaggggtctTGTAGTTAATGATTAACCCGCCATGCTACT  
TATCTACGTAGCCATGCTCTAGATTAATTAAGAGGTCGGGATAAAAGCAGTCTGGGC  
TTTCACATGACAGCATCTGGGGCTGCGGCAGAGGGTCGGGTCCGAAGCGCTGCCTTA  
TCAGCGTCCCAGCCCTGGGAGGTGACAGCTGGCTGGCTTGTGTTCAGCCCCCTCGGGC  
ACTCACGTATCTCCGTCCGACGGGTTTAAAATAGCAAACTCTGAGGCCACACAATA  
GCTTGGGCTTATATGGGCTCCTGTGGGGGAAGGGGAGCACGGAGGGGGCCGGGGC  
CGCTGCTGCCAAAATAGCAGCTCACAAGTGTTCATTCTCTGGGCGCCGGGCAC  
ATTCCTGCTGGCTCTGCCCGCCCCGGGGTGGGCGCCGGGGGACCTTAAAGCCTCTG  
CCCCCAAGGAGCCCTTCCCAGACAGCCGCGGCACCCACCGCTCCGTGGGAaccggtg  
ccaccatgaaacggacagccgacggaagcaggttcgagtcaccaagaagaagcggaaagtcttgaagtcgagtttagccacagat  
tggatgagccacgactgacctggcaaagcagcatggatgaaagagaagtccccgtggcgccgtgctgtgcaacaatagag  
tgatcggagagggatggaacaggccaatcgccgccacgacctaccgacacgcagagatcatggcactgagcagggaggcctgg  
tcattcagaattaccgctgatgatccacctgtatgtgacactggagccatgcgtgatgtgcgagagcaatgatccacagcaggat  
cggaaagagtgtgttcggagcacgggacgccaagaccggcgacagcaggctccctgatggatgtgctgcaccacccggcatgaaccac  
cgggtggagatcacagaggaatcctggcagacagtgccgcccctgctgagcgatttcttagaatcggagacaggagatcaaggc  
ccagaagaaggcacagagctccaccgactctggaggatcagcggaggatcctctggaagcagacaccaggcacaagcagatccgc  
cacaccagagagctccggcggtcctccggaggatcctctgagtgaggatttccacagactgagatgacatgacctgacctggc  
caagagggcacgcgatgagagggaggtgctgtgggagccgtgctggtgctgaacaatagagtgatcggcgagggctggaacagagc  
catggcctgcagaccaacagccatgccgaaattatggcctgagacagggcggcctggtcatgcagaactacagactgattgacgc  
cacctgtacgtgacattcagccttgcgtgatgtgcgccggcgcctgatccactctaggatcggccgctggtgtttggcgtgaggaac  
gcaaaaaccggcgccgaggtccctgatggactgctgactacccggcatgaatcaccgctgcaattaccgaggaatcctggc  
agatgaatgtgccccctgctgtgctatttcttggatgctagacaggtgtcaatgctcagaagaaggccagagctccaccgactccg  
gaggatctagcggaggctcctctggtctgagacacctggcacaagcagagcgaacacctgaaagcagcggggcagcagcggg  
ggtcagacaagaagtacagcatcggcctggccatcggccaactctgtgggctgggcccgtgatcaccgacgagtaacaaggtcccagc  
aagaaattcaaggtgctgggcaacaccgaccggcacagatcaagaagaacctgatcggagccctgctgttcgacagcggcgaacag  
ccgagggcaccggctgaagagaaccgccagaagaatataccagacggaagaaccgatctgctatctgcaagagatctttagca  
cgagatggccaaggtggacgacagcttctccagactggaagagtccttctggtggaagaggataagaagcagcagcggcacccca  
tcttcggcaacatcgtggacgaggtggcctaccacgagaagtacccaccatctaccactgagaaagaactgttgacagcaccgac

aaggccgacctgaggctgatctatctggccctggcccacatgatcaagttccggggccacttctgatcgaggcgacctgaaccccgac  
aacagcgacgtggacaagctgttcatccagctggtgcagacctacaaccagctgttcgaggaaaaccccatcaacgccagcggcgtgga  
cgccaaggccatctgtctgccagactgagcaagagcagacggctggaaaatctgatcgccagctgcccggcgagaagaagaatggc  
ctgttcggaaacctgattgccctgagcctgggctgacccccaaactcaagagcaacttcgacctggccgaggatgcaaaactgcagctga  
gcaaggacacctacgacgacgacctggacaacctgctggcccagatcgccgaccagctggttctggccgcaagaacctg  
tccgacgccatctgctgagcgacatcctgagagtgaacaccgagatcaccaaggccccctgagcgcctctatgatcaagagatcgac  
gagcaccaccaggacctgacctgctgaaagctctgctggcagcagctgctgagaagtacaaagagattttctgaccagagcaag  
aacggctacgccggctacattgacggcggagccagccaggaagagttctacaagttcatcaagccatctggaaaagatggacggcac  
cgaggaaactgctgtaagctgaacagagaggacctgctgcggaagcagcggaccttcgacaacggcagcatccccaccagatccac  
ctgggagagctgacgccattctgcccggcaggaagattttaccattctgaaggacaaccgggaaaagatcgagaagatcctgacc  
ttccgcatcccactactgctggccctctggccaggggaaacagcagattcgctggatgaccagaaaagcggaggaaccatcacc  
ctggaacttcgaggaagtggggacaagggcgttccgccagagcttcatcgagcggatgaccaacttcgataagaacctgccaacga  
gaagtgctgccaagcacagctgctgtacgagtctcaccgtgtataacgagctgaccaaagtgaatacgtgaccgagggagatgag  
aaagcccgcctctgagcggcagcagaaaaagccatctggacctgctgtcaagaccaaccggaaagtgacctgaagcagctga  
aagaggactactcaagaaaatcgagtgcctgtcctacgagacagagatcctgacagtgaggatggcctgctgccaatcggaagatcgt  
ggagaagagatcgagtgtacctgtactctgtggataacaatggcaacatctatacacagcccgtggcacagtggcacgataggggaga  
gcaggaggtgttcgagtattgctggaggacggcagcctgatcagggcaaccaaggaccacaagttcatgacagtggtgagccagatgc  
tgcceatcgacgagatttctgagcgggagctggacctgatgagagtgataactgcctaatacgaggaggcagtaaaagaacagcagac  
gggagtgagttgagcccaagaaaaagagaaaggtgtaagatctgataatcaacctctgattacaaaatttgaagattgactggtattct  
taactatgttctcttttacgctatgtggatacgtgctttaatgccttctgtatcatgctattgctcccgtatggcttctctctctctgtataa  
atcctggttagttcttggcacggcggaaactcatcgccgctgcttggccgctgctggacaggggctcggtgttgggactgacaattccg  
tgggtcgactgtgccttctagtgtccagccatctgttfttcccctccccgtgccttctgacctggaaggtgccactcccactgctcttc  
ctaataaaatgaggaattgcatcgcatgtctgagttaggtgtcattctattctggggggtggggtggggcaggacgaagggggagatt  
gggaagacaatagcagccatgctgggatcggtgggctctatggcggccGAGGGCCTATTTCCCATGATTCT  
TCATATTTGCATATACGATACAAGGCTGTTAGAGAGATAATTAGAATTAATTTGACT  
GTAAACACAAAGATATTAGTACAAAATACGTGACGTAGAAAGTAATAATTTCTTGG  
GTAGTTTGCAGTTTTAAAATTATGTTTTAAAATGGACTATCATATGCTTACCGTA  
TGAAAGTATTTTCGATTTCTTGGCTTTATATATCTTGTGGAAAGGACGAAACACCGcctc  
aggtgaaagtgggcaaGCTTAAGAGCTATGCTGGAAACAGCATAGCAAGTTTAAGTAAGGCT  
AGTCCGTTATCAACTTGAAAAAGTGGCACCGAGTCGGTGCTTTTTTTTTCGGCCGCTC  
TAGAGCATGGCTACGTAGATAAGTAGCATGGCGGGTTAATCATTAACTACAaggaacc  
ctagtgatggagttggccactccctctctgcgcgctcgtcgtcactgagggccggcgaccaaaggtcgcccgacgcccgggcttggc  
cgggcggcctcagtgagcgagcgagcgcgag

AAV9-cTnT-ABEmax-VRQR-h403 C-terminal half

AAV ITR

Cardiac Troponin T promoter

Nuclear Localization Signals (Bipartite NLS)

Npu C-terminal fragment

Linkers

SpCas9-VRQR C-terminal half

WPRE-3 (Woodchuck Hepatitis Virus Posttranscriptional Regulatory Element-3)

bGH poly(A) signal (bovine growth hormone polyadenylation signal)

hU6 promoter-sgRNA scaffold

h403\_sgRNA

Highlighted Text (Nuclear localization signals, ABEmax, Linkers, SpCas9-VRQR, Npu C-terminal fragment) encode expressed proteins.

ctgcgcgctcgtcgtcactgaggccgcccgggcaaagcccgggctcgggacaccttggctgccccggcctcagtgagcgagcgag  
cgcgagagagggagtggccaactccatcactaggggttctTGTAGTTAATGATTAACCCGCCATGCTACT  
TATCTACGTAGCCATGCTCTAGATTAATTAAGAGGTTCGGGATAAAAGCAGTCTGGGC  
TTTCACATGACAGCATCTGGGGCTGCGGCAGAGGGTTCGGGTCCGAAGCGCTGCCTTA  
TCAGCGTCCCCAGCCCTGGGAGGTGACAGCTGGCTGGCTTGTGTCAGCCCCCTCGGGC  
ACTCAGTATCTCCGTCCGACGGGTTTAAATAGCAAACTCTGAGGCCACACAATA  
GCTTGGGCTTATATGGGCTCCTGTGGGGGAAGGGGGAGCACGGAGGGGGCCGGGGC  
CGCTGCTGCCAAAATAGCAGCTCACAAGTGTTCATTCTCTTGGGCGCCGGGCAC  
ATTCTGCTGGCTCTGCCCGCCCCGGGGTGGGCGCCGGGGGACCTTAAAGCCTCTG  
CCCCCAAGGAGCCCTTCCAGACAGCCGCCGCCACCCACCGCTCCGTGGGAaccggtg  
ccaccatgaaacggacagccgacggaagcgagttcagtcaccaagaagaagcggaagtcacaaagattgctacacggaatacctg  
ggaaagcagaacgtgtacgacatcggcgtggagcgggatcacaactcgcctgaagaatggctttatcgccagcaattgcttcgactccg  
tgaaatcctcggcgtggaagatcgggtcaacgcctcctgggcacataccacgatctgctgaaaattatcaaggacaaggacttctggac  
aatgaggaaaacgaggacattctggaagatcgtgctgacctgacactgttggagacagagagatgacgaggaacggctgaaaacc  
tatgcccactgttcgacgacaaagtgatgaagcagctgaagcggcggagatacaccggctggggcaggctgagccggaagctgatca  
acggcatccgggacaagcagtcggcaagacaatcctggattcctgaagtccgacggctcgccaacagaacttcacgactgatcca  
cgacgacagcctgaccttaagaggacatccagaagcccagggtccggccaggggcgatgctgacgagcacattgccaatctgg  
ccggcagccccgccattaagaagggcatctgcagacagtgaaggtggaggacgagctcgtgaaagtgatgggcccggcacaagcccga  
gaacatcgtgatcgaatggccagagagaaccagaccaccagaagggacagaagaacagccgcgagagaatgaagcggatcgaag  
agggatcaaaagctgggacagcagatctgaaagaacccccgtggaaacacccagctgcagaacgagaagctgtacctgtactac  
ctgcagaatggcgggatgtgactgtggaccaggaactggacatcaaccggctgtccgactacgatgtggaccatatcgtgcctcagagct  
ttctgaaggacgactccatcgataacaaggtgctgaccagaagcgacaagaaccggggcaagagcgacaacgtgcctccgaagaggt  
cgtgaagaagatgaagaactactggcggcagctgctgaacgccaagctgattaccagagaaagttcgacaatctgaccaaggccgaga  
gaggcggcctgagcgaactgataagccggcttcatcaagagacagctggtggaaacccggcagatcacaagcacgtggcacagat  
cctggactccggatgaacactaagtacgacgagaatgacaagctgatccgggaagtgaagtgatcacctgaagtccaagctggtgct  
cgattccggaaggatttccagttttacaaagtgcgcgagatcaacaactaccaccacgccacgacgcctacctgaacgccctcgtggga  
accgacctgatcaaaaagtaccctaagctggaagcagttcgtgtacggcgactacaaggtgtacgacgtgcggaagatgacccaag  
agcgagcaggaaatcggcaaggctaccgcaagcttctttacagcaacatcatgaacttttcaagaccgagattaccctggccaacgg  
cgagatccggaagcggcctctgatcagacaaacggcgaaaccggggagatcgtgtgggataaggccgggatttggccaccgtcggg  
aaagtgtgagcatgccccagtgatgataatcgtgaaaaagaccgaggtgcagacaggcggcttcagaaagagcttatcctgccaagag  
gaacagcgataagctgatcggcagaagaaggactgggacctaaagaagctggcggctcgtgagccccaccgtggcctattctgtgct  
gggtgtggcacaagtggaaaaggcgaagtccaagaaactgaagagtgtgaaagagctgctggggatcacatcatggaagaagcagc  
ttcgagaagaatccatcgactttctggaagccaagggtacaaagaagtgaaaaaggacctgatcatcaagctgcctaagctactcctgtt  
cgagctggaaacggcgggaagagaatgctggcctcagccagagaactgcagaagggaacgaactggcctgcctccaaatagt  
aactcctgtacctggccagccactatgagaagctgaagggctccccgaggataatgagcagaacagctgtttgtggaacagcacaag  
cactacctggacgagatcatcagcagatcagcgagttctccaagagagtgatcctggccgacgctaacttgacaaaagtgtgtccgct  
acaacaagcaccgggataagccatcagagagcaggccgagaatcatccacctgttaccctgaccaatctgggagcccctgccgct  
tcaagtactttgacaccaccatcagccggaagcagctacagaagcaccaaagaggtgctggacgccacctgatccaccagagatcacc  
ggcctgtacgagacaggtatgacctgtctcagctgggaggtgactctggcggctcaaaaagaaccggcagcgcaattcgagcc  
caagaagaagaggaaagctaaagatctgataatcaacctctggattacaaaattgtgaaagattgactggattcttaactatgttgcctttta  
cgctatgtggatagctgctttaatgctttgtatcatgctattgcttcccgtatggctttcattttctctcttgtataaatcctggttagtttcc  
acggcggaaactcatcgccgctgcttggcccgtgctggacaggggctcggctgttgggactgacaattccgtggctgactgtgccttc  
tagttgccagccatctgtttgttggccccctcccgctgcttccctgacctggaaggtgccactcccactgtcctttcctaataaatgaggaaat

tgcatcgcattgtctgagtaggtgtcattctattctgggggggtgggggtggggcaggacagcaagggggaggattgggaagacaatagcag  
gcatgctggggatgcggtgggctctatggctcgaGAGGGCCTATTTCCCATGATTCCTTCATATTTGCAT  
ATACGATACAAGGCTGTTAGAGAGATAATTAGAATTAATTTGACTGTAAACACAAA  
GATATTAGTACAAAATACGTGACGTAGAAAAGTAATAATTTCTTGGGTAGTTTGCAGT  
TTTAAAATTATGTTTTAAAATGGACTATCATATGCTTACCGTAACTTGAAAGTATTC  
GATTTCTTGGCTTTATATATCTTGTGGAAAGGACGAAACACCGcctcaggtgaaagtgggcaaG  
CTTAAGAGCTATGCTGGAAACAGCATAGCAAGTTTAAGTAAGGCTAGTCCGTTATCA  
ACTTGAAAAAGTGGCACCGAGTCGGTGCTTTTTTTGCGGCCGCTCTAGAGCATGGCT  
ACGTAGATAAGTAGCATGGCGGGTTAATCATTAACTACAaggaaccctagtgatggagttggccac  
tcctctctgcgcgctcgctcgctcactgaggccgggagaccaaaggtcgcccagcccgggctttcccgggaggcctcagtgagcg  
agcgagcgcgag

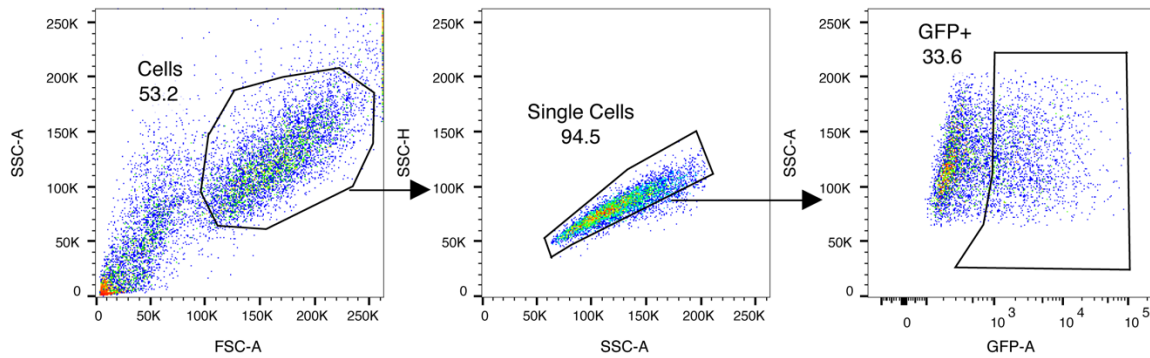

**Supplementary Figure 1. Representative flow cytometry gating strategy for GFP+ iPSCs.**

For generation of isogenic iPSCs containing the *MYH7* c.1208 G>A (p.R403Q) mutation via homology-directed repair, and for base editing correction of the *MYH7* c.1208 G>A (p.R403Q) mutation, iPSCs were nucleofected with a single plasmid encoding Cas9 nuclease or an adenine base editor linked to GFP via a 2A self-cleaving peptide, and the sgRNA of interest. Cells that were successfully nucleofected with the gene editing components express GFP, and single GFP+ iPSCs were collected.

Whole heart  
homogenate control

↓

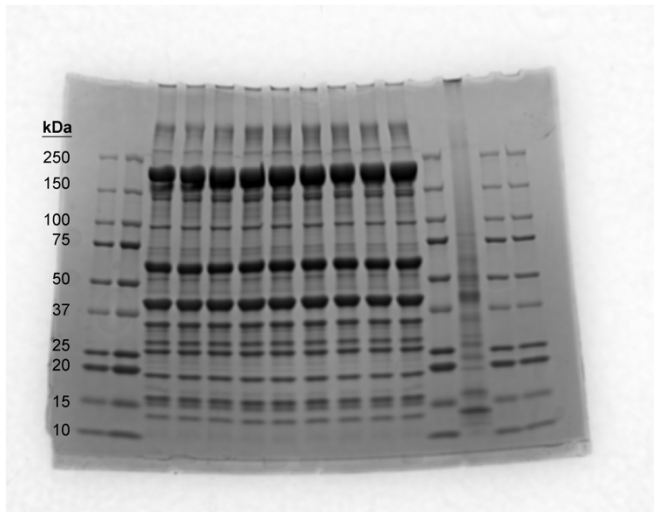

**Supplementary Figure 2. Uncut gels.** Full unedited gel for Extended Data Fig 6. Molecular weights for ladder markings are in kDa.

**Supplementary Table 1. Summary of oligos**

| Oligo Name                                        | Oligo Sequence                                                                                                                             |
|---------------------------------------------------|--------------------------------------------------------------------------------------------------------------------------------------------|
| sgRNA for HDR Knock-In of MYH7 R403Q              | TCATTGCCCACTTTCACCCG                                                                                                                       |
| ssODN for HDR Knock-In of MYH7 R403Q              | TGCTACTTGCCTTTTCCTTCCAGAGGCTGACAAGTCTGCCTACCTC<br>ATGGGGCTGAACTCAGCCGACCTGCTCAAGGGGCTGTGCCACCCT<br>CAGGTGAAAGTGGGCAATGAGTACGTCACCAAGGGGCAG |
| Sequencing for hMYH7 F                            | ACCTCCACATCCTGGGTTCAA                                                                                                                      |
| Sequencing for hMYH7 R                            | GTGGAGGAGAGACCCATATT                                                                                                                       |
| Sequencing for hMYH6 F                            | GGAGGCTGTAGTGAGCCAAG                                                                                                                       |
| Sequencing for hMYH6 R                            | AGGAGCAAGCGAGTGATTGT                                                                                                                       |
| h403_sgRNA                                        | CCGCAGGTGAAAGTGGGCAA                                                                                                                       |
| HTS ON-Target F                                   | TCGTCGGCAGCGTCAGATGTGTATAAGAGACAGTCCTCTCATACA<br>CTGCCTTGG                                                                                 |
| HTS ON-Target R                                   | GTCTCGTGGGCTCGGAGATGTGTATAAGAGACAGCACCATGCCTG<br>GCTAATTTT                                                                                 |
| HTS OFF1 F                                        | TCGTCGGCAGCGTCAGATGTGTATAAGAGACAGGGGACAATGAC<br>TGCCTCTGT                                                                                  |
| HTS OFF1 R                                        | GTCTCGTGGGCTCGGAGATGTGTATAAGAGACAGTACCTCATGGG<br>GCTGAACTC                                                                                 |
| HTS OFF2 F                                        | TCGTCGGCAGCGTCAGATGTGTATAAGAGACAGCAGGTCTCGATT<br>CCAAGGAG                                                                                  |
| HTS OFF2 R                                        | GTCTCGTGGGCTCGGAGATGTGTATAAGAGACAGGCACAACCCA<br>CAAGTTTGTTT                                                                                |
| HTS OFF3 F                                        | TCGTCGGCAGCGTCAGATGTGTATAAGAGACAGTTTTCAAATAT<br>TCCTGCTCACT                                                                                |
| HTS OFF3 R                                        | GTCTCGTGGGCTCGGAGATGTGTATAAGAGACAGAGGCACCTTTC<br>TGTGTGCTT                                                                                 |
| HTS OFF4 F                                        | TCGTCGGCAGCGTCAGATGTGTATAAGAGACAGATTCTGGATGCA<br>GGATTTGC                                                                                  |
| HTS OFF4 R                                        | GTCTCGTGGGCTCGGAGATGTGTATAAGAGACAGGTGGACAACA<br>GGCCACTCTT                                                                                 |
| HTS OFF5 F                                        | TCGTCGGCAGCGTCAGATGTGTATAAGAGACAGGGACAATTTGT<br>ATTTTAGCTTATTTTC                                                                           |
| HTS OFF5 R                                        | GTCTCGTGGGCTCGGAGATGTGTATAAGAGACAGTCCCCTGCTTT<br>TCTCTGTGT                                                                                 |
| HTS OFF6 F                                        | TCGTCGGCAGCGTCAGATGTGTATAAGAGACAGTGATCCTGAAG<br>ATTAGTGGATGC                                                                               |
| HTS OFF6 R                                        | GTCTCGTGGGCTCGGAGATGTGTATAAGAGACAGCCATCCTGAG<br>ATAATCCTCCA                                                                                |
| HTS OFF7 F                                        | TCGTCGGCAGCGTCAGATGTGTATAAGAGACAGACCTAGGAGGC<br>TGGGATTGT                                                                                  |
| HTS OFF7 R                                        | GTCTCGTGGGCTCGGAGATGTGTATAAGAGACAGCATGACAAGG<br>AGTCCGAGGT                                                                                 |
| HTS OFF8 F                                        | TCGTCGGCAGCGTCAGATGTGTATAAGAGACAGGCCCTGGTTAC<br>AGCATAAG                                                                                   |
| HTS OFF8 R                                        | GTCTCGTGGGCTCGGAGATGTGTATAAGAGACAGCCACAACCAC<br>TGACTGACTGA                                                                                |
| sgRNA for Knock-In of MYH7 R403Q into murine Myh6 | TCGTTCCCCACCTTCACCCG                                                                                                                       |

|                                                   |                                                                                                                                                                                                     |
|---------------------------------------------------|-----------------------------------------------------------------------------------------------------------------------------------------------------------------------------------------------------|
| ssODN for Knock-In of MYH7 R403Q into murine Myh6 | TGGGACAAAGGAATGGAGGTACTGAAAATGCTTCCCCTCCTTG<br>TCTATCAGATGCTGACAAATCAGCCTACCTCATGGGGCTGAACTC<br>AGCCGACCTGCTCAAGGGGCTGTGCCACCCTCAGGTGAAAGTGG<br>GCAATGAGTACGTCACCAAGGGGCAGAGTGTACAGCAAGTGTAC<br>TAT |
| Genotyping for Myh6 F                             | GAGAAGCAGTGGTCATCATC                                                                                                                                                                                |
| Genotyping for Myh6 R                             | GTGAGAAACACGTGGTGTCC                                                                                                                                                                                |
| HTS Myh6 On-Target F                              | TCGTCCGCAGCGTCAGATGTGTATAAGAGACAGGGATCAAGGAC<br>ATGGCAAAT                                                                                                                                           |
| HTS Myh6 On-Target R                              | GTCTCGTGGGCTCGGAGATGTGTATAAGAGACAGGCTTGGTCTCC<br>AGGGTTG                                                                                                                                            |
| HTS Myh6 cDNA On-Target F                         | TCGTCCGCAGCGTCAGATGTGTATAAGAGACAGGATGGCACAGA<br>AGATGCTGA                                                                                                                                           |
| HTS Myh6 cDNA On-Target R                         | GTCTCGTGGGCTCGGAGATGTGTATAAGAGACAGCGAACATGTG<br>GTGGTTGAAG                                                                                                                                          |
| Sanger Myh6 cDNA On-Target F                      | GCTCTTGGCCACTGATAGTGC                                                                                                                                                                               |
| Sanger Myh6 cDNA On-Target R                      | GCTCAAAGCTGTTGAAATCG                                                                                                                                                                                |
| VCN N terminal AAV half F                         | ACCAGAAAGAGCGAGGAAAC                                                                                                                                                                                |
| VCN N terminal AAV half R                         | TCGTTGGGCAGGTTCCTTATC                                                                                                                                                                               |
| VCN N terminal AAV Probe                          | /56-FAM/TTGGTCATC/ZEN/CGCTCGATGAAGCTC/3IABkFQ/                                                                                                                                                      |
| VCN C terminal AAV half F                         | CCCAAGAGGAACAGCGATAAG                                                                                                                                                                               |
| VCN C terminal AAV half R                         | CCACCACCAGCACAGAATAG                                                                                                                                                                                |
| VCN C terminal AAV Probe                          | /56-FAM/ATCGCCAGA/ZEN/AAGAAGGACTGGGAC/3IABkFQ/                                                                                                                                                      |
